# Supplementary material for: Structural, electronic, and optical properties of cubic formamidinium lead iodide perovskite: a first-principles investigation
Source: Royal Society of Chemistry journal article supplement (doi:10.1039/d0ra06028c), 2020-01-01
Supplement: d0ra06028c1.pdf [file d0ra06028c1.pdf]

**Supporting information:**

**Structural, electronic, and optical properties of cubic formamidinium lead iodide perovskite: A first-principles investigation**

Sanjun Wang<sup>a</sup>, Wen-bo Xiao<sup>b</sup>, Fei Wang<sup>c,\*</sup>

<sup>a</sup> College of Artificial Intelligence, Henan Finance University, Zhengzhou 450046, China;

<sup>b</sup> Key Laboratory of Nondestructive testing, Ministry of Education, Nanchang Hangkong University, Nanchang 330063, China;

<sup>c</sup> International Laboratory for Quantum Functional Materials of Henan, School of Physics and Microelectronics, Zhengzhou University, Zhengzhou 450001, China.

The POSCAR file for FAPbI<sub>3</sub> PBE [111].

FAPbI<sub>3</sub> PBE [111]

```
1.0000000000000000
  6.4589972925718193    0.0000000000000000    0.0000000000000000
  0.0000000000000000    6.4589972925718193    0.0000000000000000
  0.0000000000000000    0.0000000000000000    6.4589972925718193
```

```
C    N    H    Pb    I
  1    2    5    1    3
```

Direct

```
0.4446100039999976  0.4784399710000002  0.5249500150000017
0.4421560795451001  0.6094450370013220  0.3706999280163501
0.5863716296305626  0.4718834382313304  0.6686733616323792
0.3189267628053969  0.3661898113936886  0.5342151560554598
0.3247655868173496  0.6012420605569488  0.2649740724251757
0.5524830491180950  0.7206484476027484  0.3514892894933936
0.7094075923344363  0.5702758137779185  0.6715301513277225
0.5768870461671369  0.3618426087835545  0.7817959997122372
0.0000000000000000  0.0000000000000000  0.0000000000000000
0.4955008036196986  0.0340738133587379  0.0084927291793448
0.0104307130704626  0.5068825151667298  0.0309936222465907
0.9559045289805326  0.9716826665041225  0.5159527464927507
```

---

\* Email:wfei@zzu.edu.cn
